# Supplementary material for: A novel photoluminescent Cd(ii)–organic framework exhibiting rapid and efficient multi-responsive fluorescence sensing for trace amounts of Fe3+ions and some NACs, especially for 4-nitroaniline and 2-methyl-4-nitroaniline
Source: Royal Society of Chemistry journal article supplement (doi:10.1039/c6tc04195g), 2016-01-01
Supplement: c6tc04195g1.pdf [file c6tc04195g1.pdf]

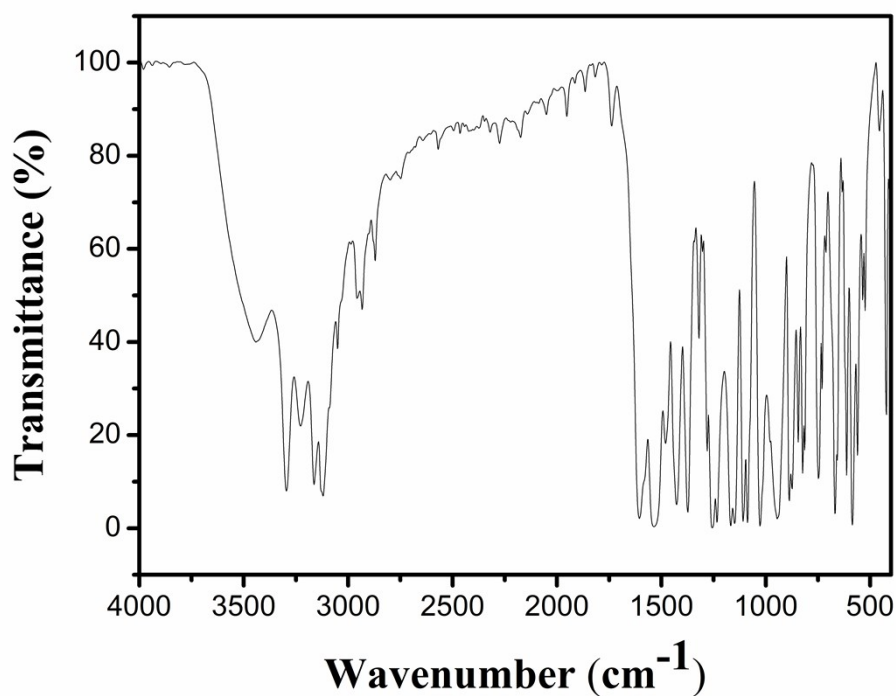

**Fig. S1** FT-IR spectrum of MOF 1.

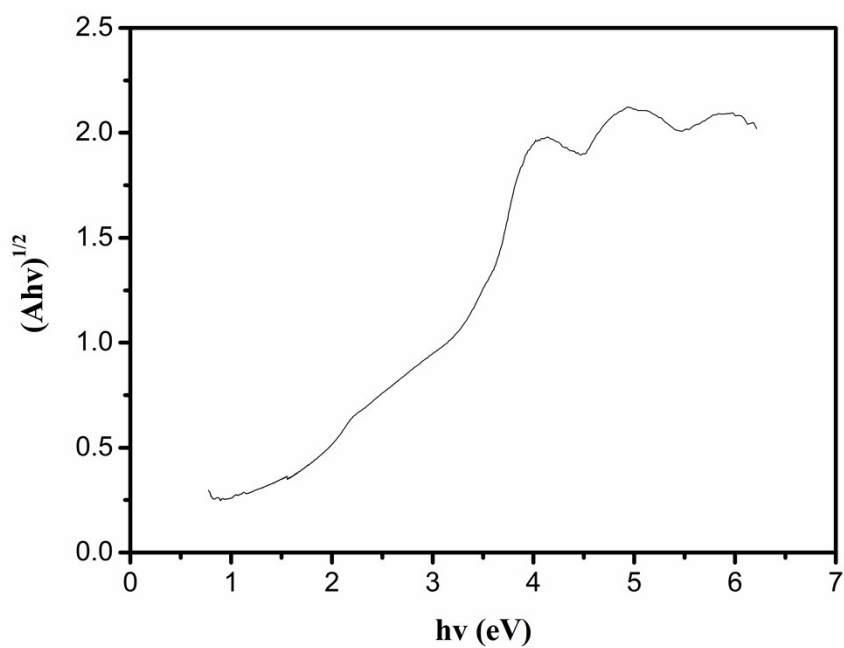

**Fig. S2** Diffuse reflectance UV-*vis* spectrum of  $(Ah\nu)^{1/2}$  vs photon energy ( $h\nu$ ) for 1.

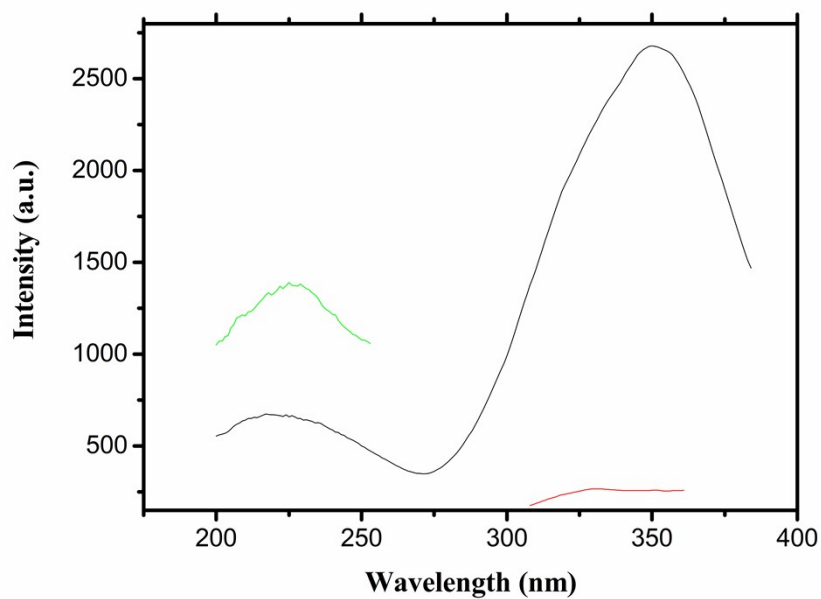

**Fig. S3** The excitation spectra of H<sub>2</sub>5-asba (red), Bimb (green) and MOF 1 (black).

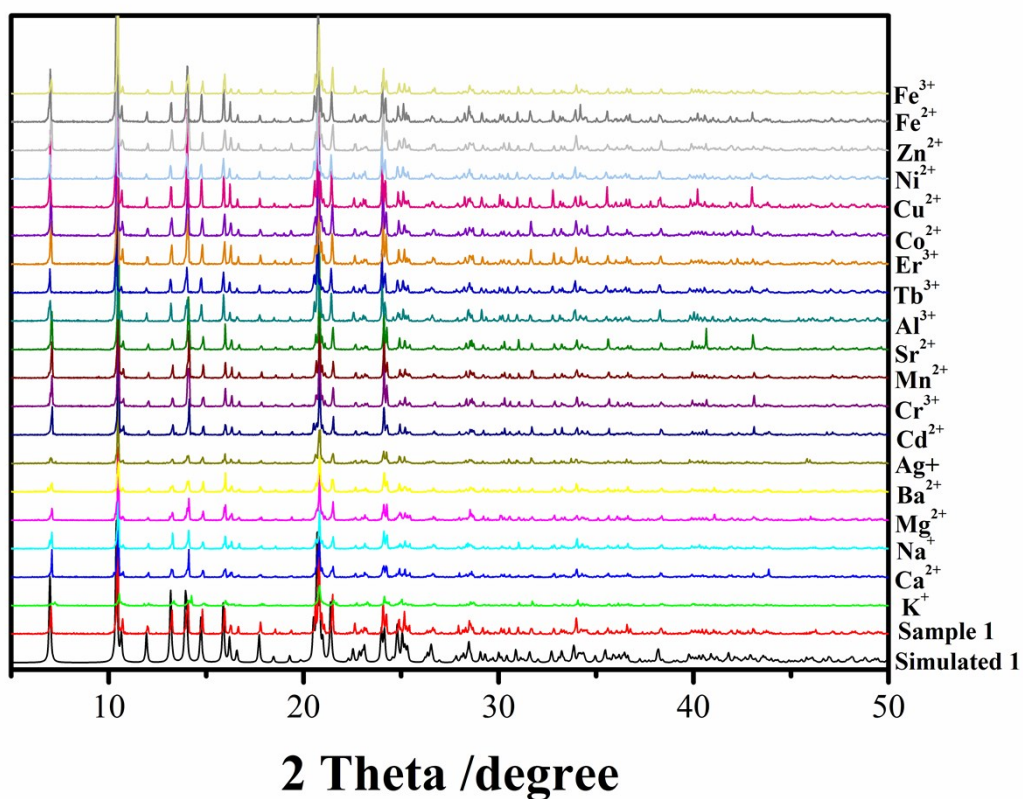

**Fig. S4** A variety of PXRD patterns of the samples after immersion in different aqueous metal ion solutions for about five hours, the PXRD pattern of the bulk sample 1 and the simulated XRD pattern of 1 calculated from single-crystal X-ray data with Mercury 1.4.2.

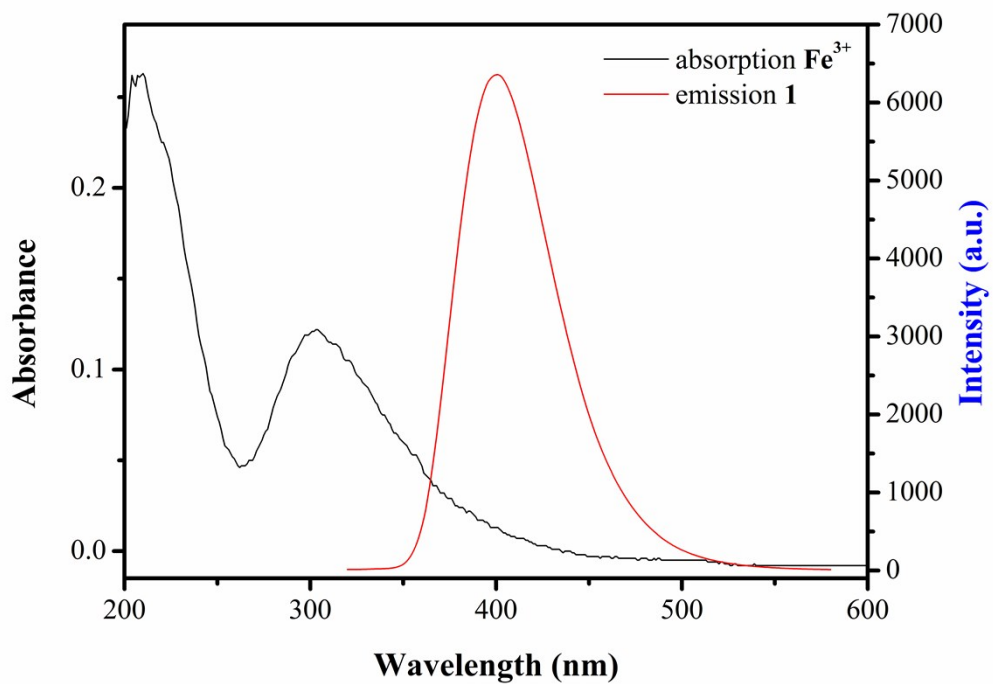

**Fig. S5** Spectral overlap between the absorption spectrum of aqueous Fe<sup>3+</sup> solution and the emission spectrum of **1** in aqueous medium.

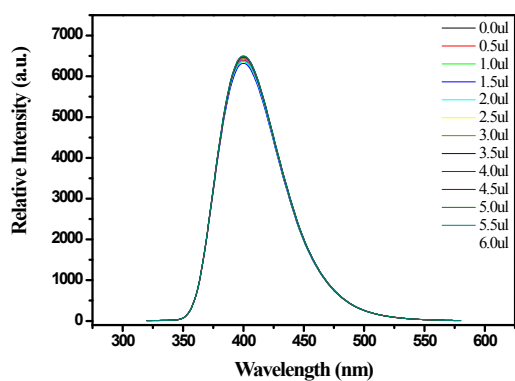

**BZ**

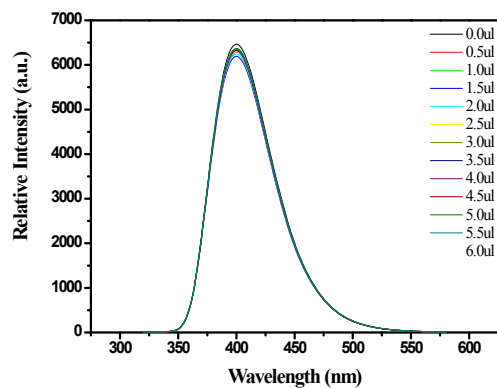

**PL**

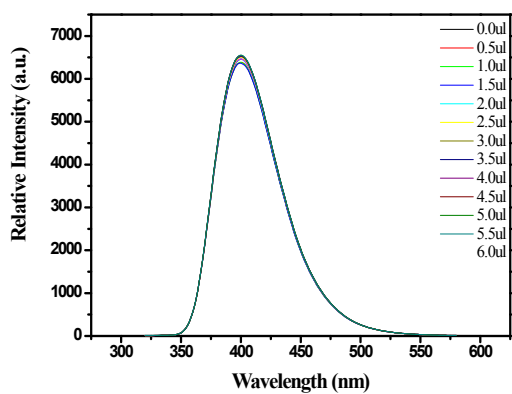

**MB**

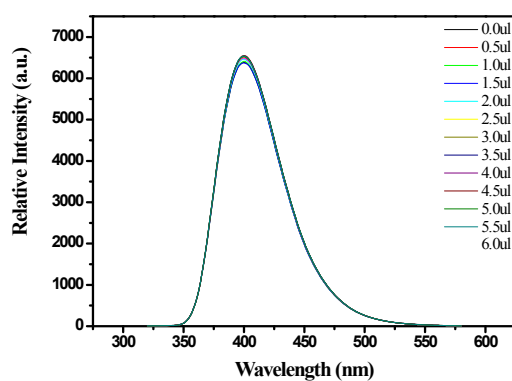

**CB**

**Fig. S6** Photoluminescence spectra of the aqueous suspensions of **1** with incremental addition of various methanol solutions of benzene compounds (0.075 M). The volumes of methanol solutions of benzene compounds added are indicated in the legend.

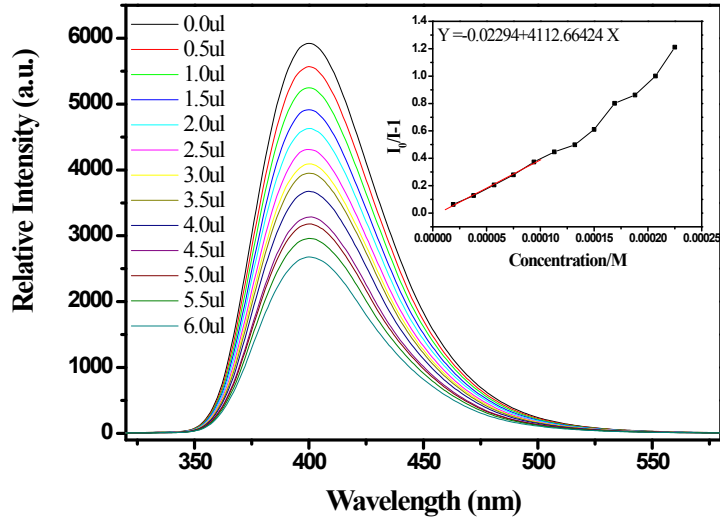

(Top)

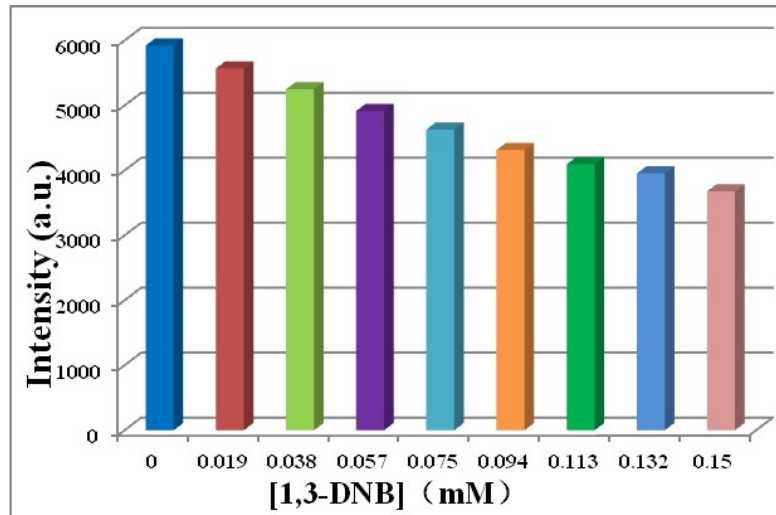

(Bottom)

**1, 3-DNB**

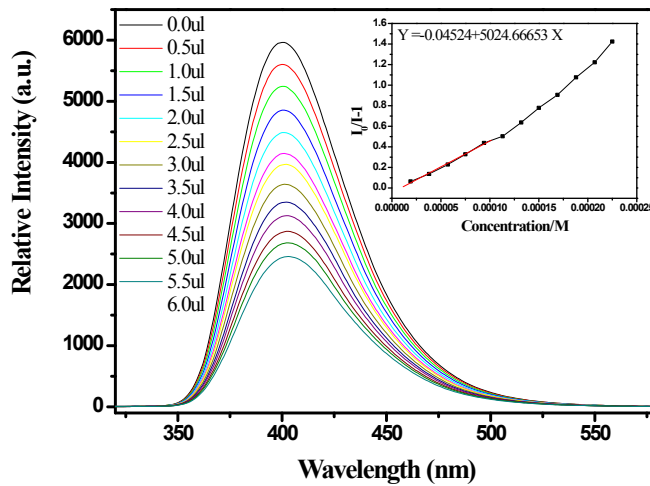

(Top)

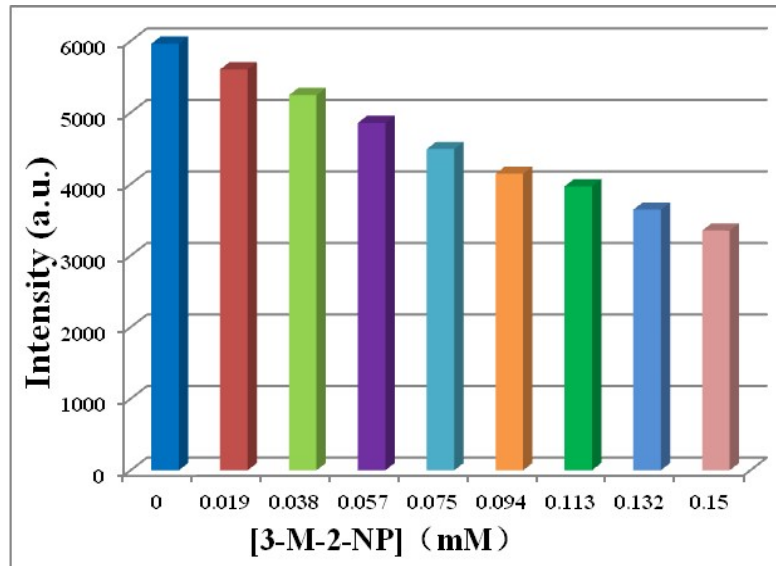

(Bottom)

3-M-2-NP

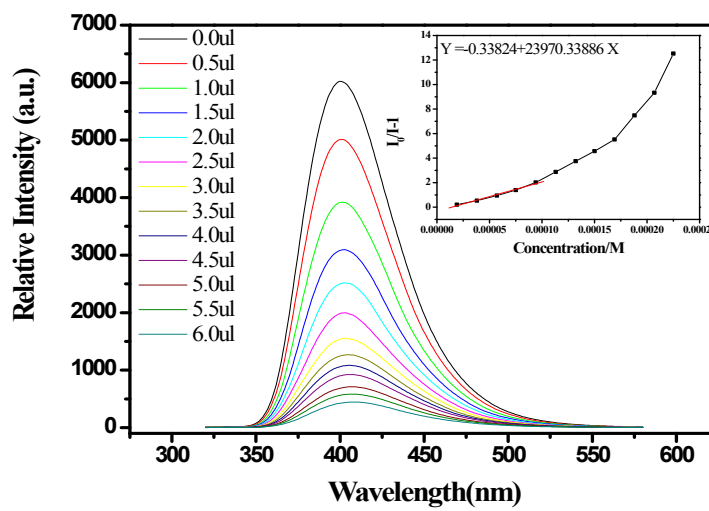

(Top)

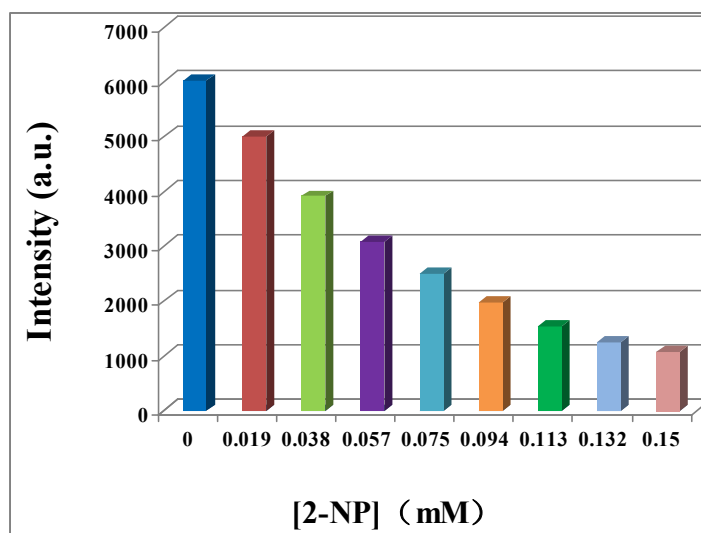

(Bottom)

2-NP

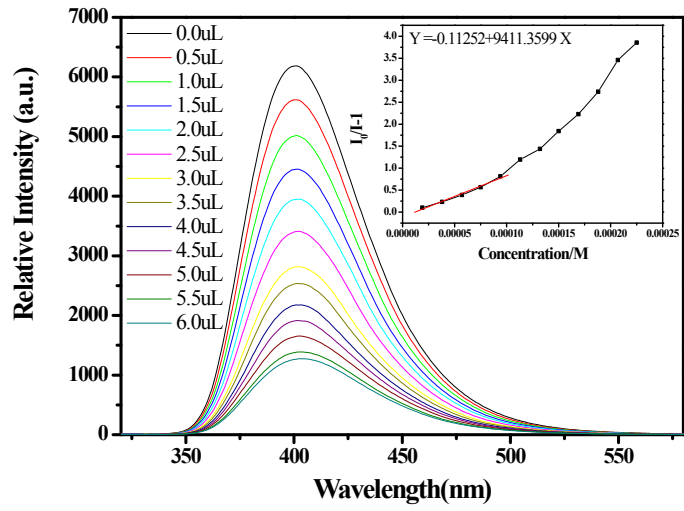

(Top)

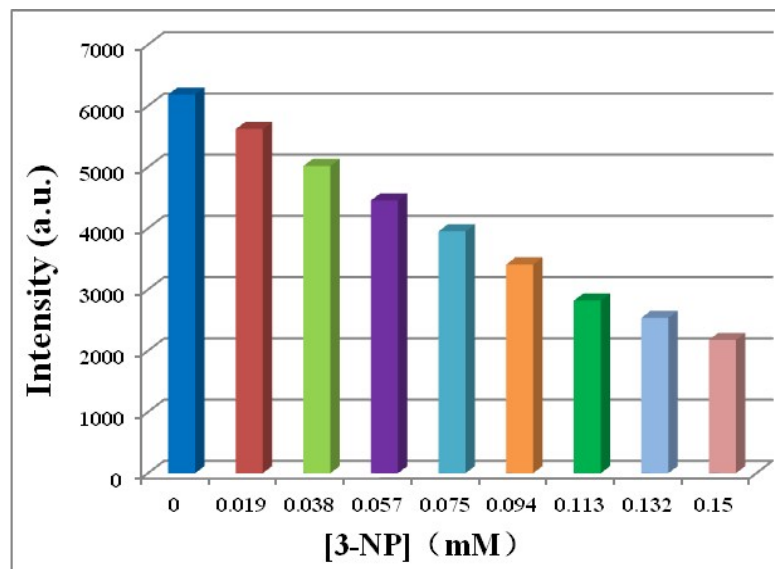

(Bottom)

3-NP

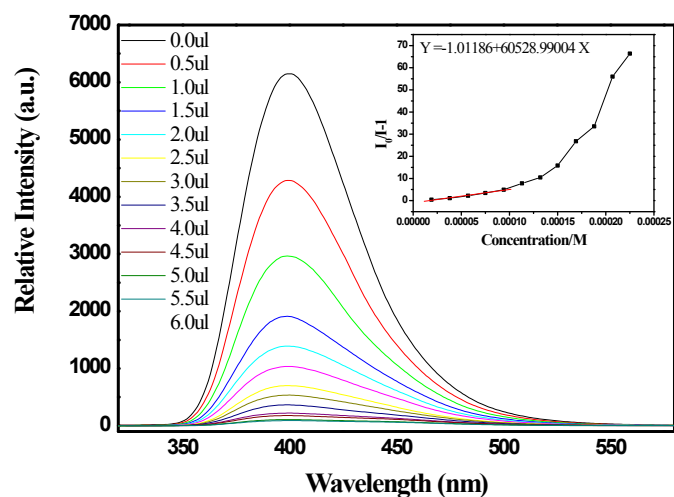

(Top)

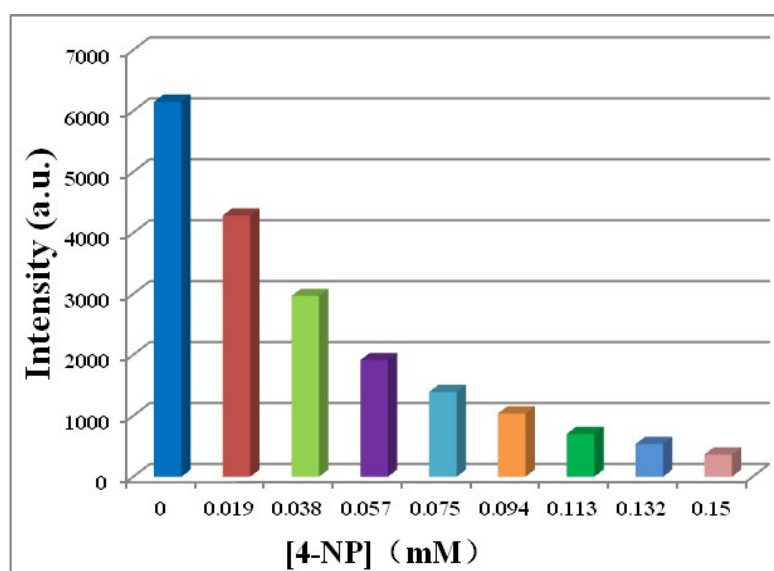

(Bottom)

4-NP

**Fig. S7** Photoluminescence spectra and the best linear fit of  $I_0/I_{-1}$  versus concentration (**Top**), the relative intensity of the maximum emission (**Bottom**) of MOF 1 dispersed in water with incremental addition of the corresponding NACs in methanol. The volumes of methanol solution of the corresponding NACs added are indicated in the legend.



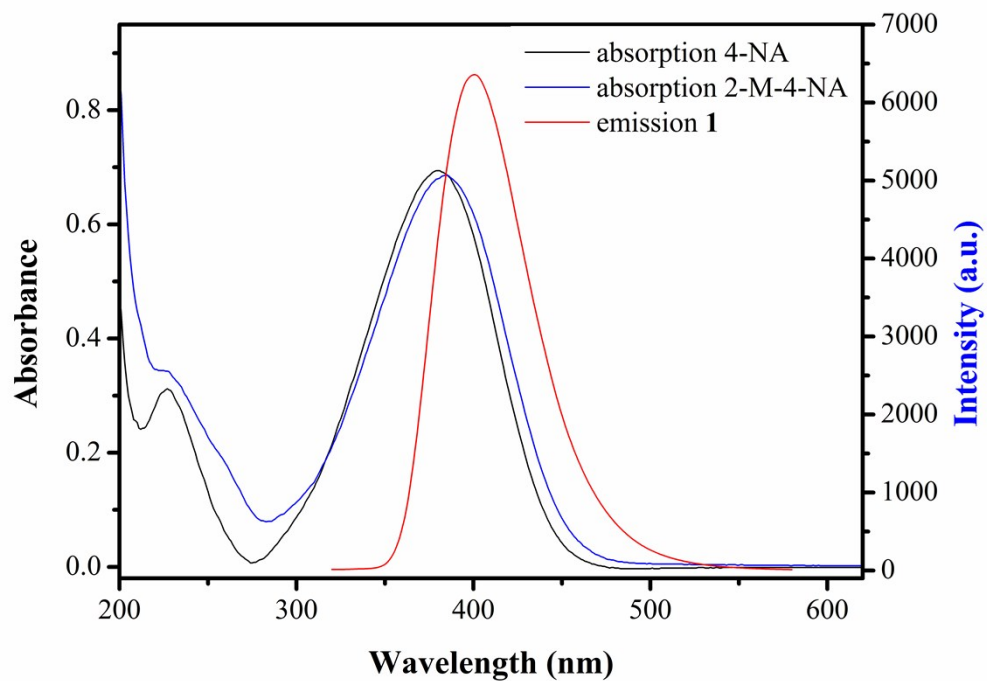

**Fig. S8** Spectral overlap between the absorption spectra of 4-NA/2-M-4-NA and the emission spectrum of **1** in aqueous medium.

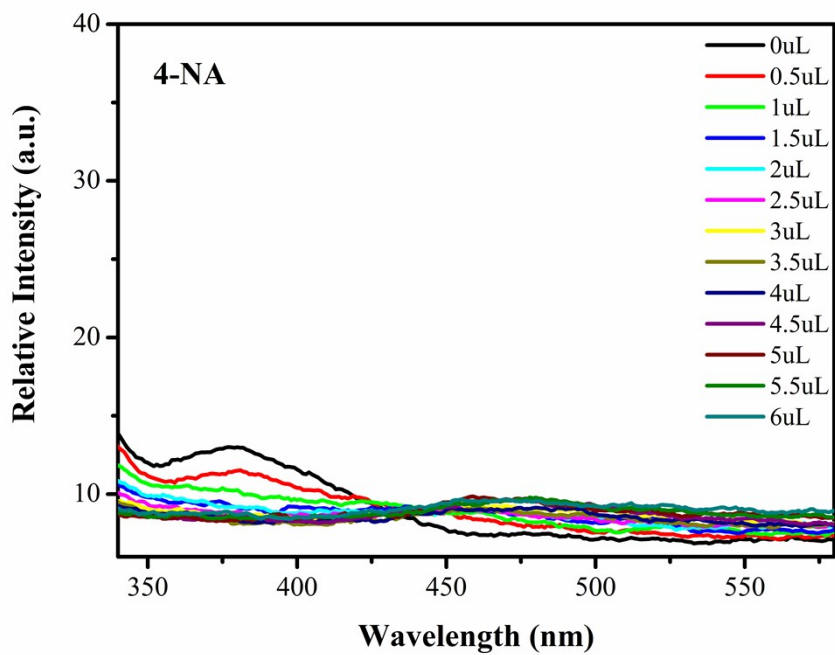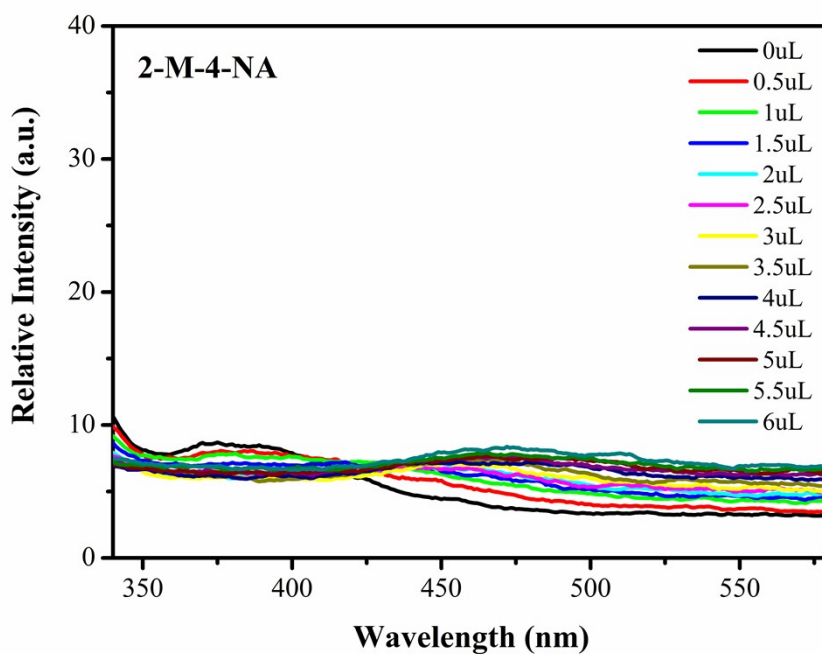

**Fig. S9** Fluorescence emission spectra of the aqueous solution of 4-NA and 2-M-4-NA by incrementally adding methanol solution of 4-NA and 2-M-4-NA (0.075 M) into 2 ml of water ( $\lambda_{\text{ex}} = 300$  nm). The volumes of methanol solution of 4-NA and 2-M-4-NA added are indicated in the legend.

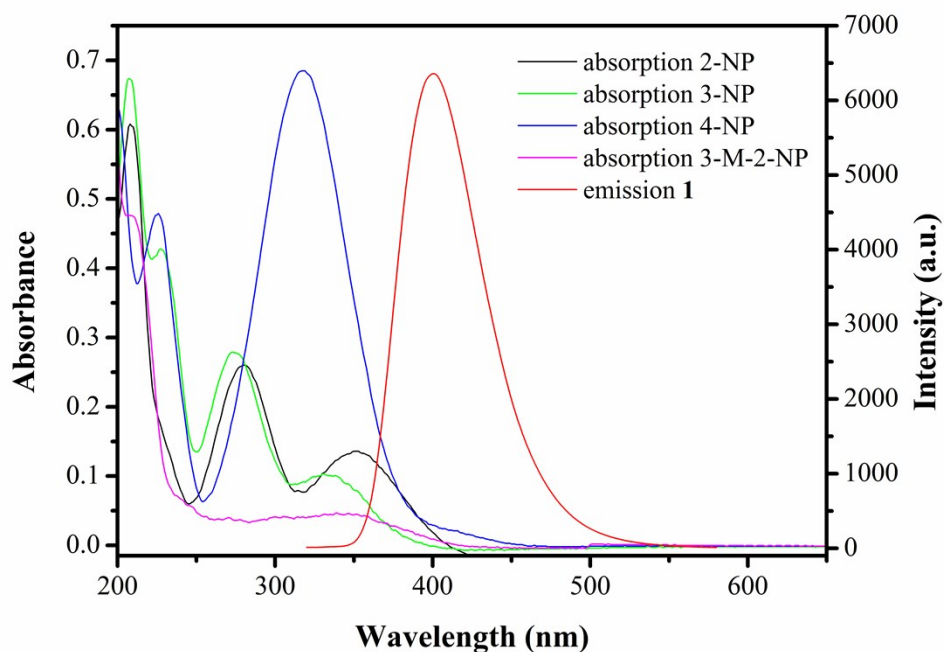

**Fig. S10** Spectral overlap between the absorption spectra of analytes 2-/3-/4-NP, 3-M-2-NP and the emission spectrum of **1** in aqueous medium.

**Table S1.** The Stern–Volmer constants ( $K_{SV}$ ) for some NACs

| NACs     | $K_{SV}/(L/mol)$ | NACs     | $K_{SV}/(L/mol)$ |
|----------|------------------|----------|------------------|
| 2-NP     | $2.4 \cdot 10^4$ | 3-NP     | $9.4 \cdot 10^3$ |
| 4-NP     | $6.1 \cdot 10^4$ | 3-M-2-NP | $5.0 \cdot 10^3$ |
| 1, 3-DNB | $4.1 \cdot 10^3$ |          |                  |

**Table S2** pH of the aqueous metal ion-containing suspensions of **1** (0.075 mM) and the aqueous suspension of **1**.

| MOF <b>1</b> /Metal ion | pH   | Metal ion | pH   |
|-------------------------|------|-----------|------|
| MOF <b>1</b>            | 7.04 | $Sr^{2+}$ | 6.87 |
| $Na^+$                  | 7.00 | $Co^{2+}$ | 6.83 |
| $Mg^{2+}$               | 6.77 | $Ni^{2+}$ | 6.55 |
| $Al^{3+}$               | 5.43 | $Cu^{2+}$ | 6.48 |
| $K^+$                   | 7.00 | $Zn^{2+}$ | 5.33 |
| $Ca^{2+}$               | 6.91 | $Ag^+$    | 6.86 |
| $Cr^{3+}$               | 5.53 | $Cd^{2+}$ | 6.67 |
| $Mn^{2+}$               | 6.61 | $Ba^{2+}$ | 6.94 |
| $Fe^{3+}$               | 4.26 | $Eu^{3+}$ | 6.61 |
| $Fe^{2+}$               | 6.22 | $Tb^{3+}$ | 6.70 |
